# Supplementary material
Source: PubMed Central journal article supplement (PMC4509925)
Supplement: NIHMS693031-supplement-2.pdf [file NIHMS693031-supplement-2.pdf]

Supplementary Table 1. Blood cell counts in *Foxm1*<sup>fl/fl</sup> and *Foxm1*<sup>fl/fl</sup>*Mx1*-Cre Mice

| Table1. Blood cell counts in 6-Week-Old <i>Foxm1</i> <sup>fl/fl</sup> and <i>Foxm1</i> <sup>fl/fl</sup> <i>Mx1</i> -Cre Mice |                               |                                               |          |
|------------------------------------------------------------------------------------------------------------------------------|-------------------------------|-----------------------------------------------|----------|
|                                                                                                                              | <i>Foxm1</i> <sup>fl/fl</sup> | <i>Foxm1</i> <sup>fl/fl</sup> <i>Mx1</i> -Cre | P Value  |
| WBC(K/ $\mu$ L)                                                                                                              | 12.26 $\pm$ 1.88              | 7.67 $\pm$ 1.13                               | 0.000172 |
| NE(K/ $\mu$ L)                                                                                                               | 3.38 $\pm$ 0.67               | 1.69 $\pm$ 0.40                               | 0.000144 |
| LY(K/ $\mu$ L)                                                                                                               | 8.10 $\pm$ 1.17               | 5.61 $\pm$ 0.69                               | 0.000501 |
| MO(K/ $\mu$ L)                                                                                                               | 0.52 $\pm$ 0.12               | 0.28 $\pm$ 0.06                               | 0.000813 |
| EO(K/ $\mu$ L)                                                                                                               | 0.10 $\pm$ 0.08               | 0.08 $\pm$ 0.11                               | NS       |
| BA(K/ $\mu$ L)                                                                                                               | 0.06 $\pm$ 0.08               | 0.03 $\pm$ 0.02                               | NS       |
| RBC(M/ $\mu$ L)                                                                                                              | 10.22 $\pm$ 1.05              | 9.93 $\pm$ 0.54                               | NS       |
| Hb(g/dL)                                                                                                                     | 15.56 $\pm$ 0.84              | 14.55 $\pm$ 0.69                              | NS       |
| HCT(%)                                                                                                                       | 59.54 $\pm$ 6.90              | 58.74 $\pm$ 4.28                              | NS       |
| MCV(fL)                                                                                                                      | 58.24 $\pm$ 2.01              | 59.10 $\pm$ 1.60                              | NS       |
| MCH(pg)                                                                                                                      | 15.34 $\pm$ 1.68              | 14.66 $\pm$ 0.58                              | NS       |
| PLT(K/ $\mu$ L)                                                                                                              | 1016 $\pm$ 115                | 848 $\pm$ 118                                 | 0.020942 |

Values shown are the mean  $\pm$  SD for 5 mice per genotype. WBC, white blood cell; NE, neutrophils; LY, lymphocytes; MO, monocytes; EO, eosinophils; BA, basophils; RBC, red blood cell; Hb, hemoglobin; HCT, hematocrit; MCV, mean corpuscular volume; MCH, mean corpuscular hemoglobin; PLT, platelet; NS, not significant.

## Supplementary Table 2. Gene lists in the heatmap

| SYMBOL    | ProbeID  | FoxM1-W  | FoxM1-W  | FoxM1-W  | FoxM1-M  | FoxM1-M  | FoxM1-M  | W        | M        | dif.     | ttest    | Ratio    | Fold change |
|-----------|----------|----------|----------|----------|----------|----------|----------|----------|----------|----------|----------|----------|-------------|
| Dnajb9    | 10400137 | 8.715106 | 9.370588 | 8.384314 | 5.642471 | 6.415591 | 5.771725 | 8.823336 | 5.943262 | -2.88007 | 0.001557 | 0.135835 | -7.3618781  |
| Ltn1      | 10440560 | 5.41328  | 6.589815 | 4.621091 | 2.256666 | 2.834494 | 3.20371  | 5.541395 | 2.754623 | -2.78677 | 0.012055 | 0.14491  | -6.9008419  |
| Ppp1r11   | 10450814 | 6.511727 | 7.730901 | 6.374607 | 5.359207 | 4.380608 | 5.049904 | 6.872411 | 4.929906 | -1.94251 | 0.020056 | 0.260164 | -3.8437249  |
| Cox16     | 10401309 | 6.358564 | 7.715133 | 7.022812 | 4.865371 | 5.415234 | 5.448324 | 7.03217  | 5.242976 | -1.78919 | 0.014681 | 0.289334 | -3.4562158  |
| Olf46     | 10558649 | 6.503832 | 6.573215 | 6.558371 | 5.431236 | 4.277866 | 4.639702 | 6.545139 | 4.782935 | -1.7622  | 0.006677 | 0.294797 | -3.3921606  |
| Eea1      | 10365933 | 7.64908  | 6.756991 | 7.476211 | 5.93465  | 4.970249 | 5.745036 | 7.294094 | 5.549978 | -1.74412 | 0.01227  | 0.298517 | -3.3498949  |
| BC024479  | 10584309 | 5.432672 | 5.859922 | 6.012388 | 3.644563 | 4.874021 | 3.617977 | 5.768328 | 4.045521 | -1.72281 | 0.018532 | 0.302959 | -3.3007801  |
| Ncoa4     | 10399198 | 10.42763 | 9.992425 | 9.804756 | 8.029585 | 8.704955 | 8.324798 | 10.07494 | 8.353113 | -1.72182 | 0.00305  | 0.303165 | -3.2985332  |
| Cenpo     | 10394283 | 6.973467 | 6.978941 | 6.051178 | 5.41736  | 4.530569 | 5.017648 | 6.667862 | 4.988526 | -1.67934 | 0.013833 | 0.312226 | -3.2028053  |
| Vmn1r117  | 10560744 | 3.425462 | 4.441753 | 3.906318 | 2.32284  | 2.039286 | 2.40858  | 3.924511 | 2.256902 | -1.66761 | 0.006044 | 0.314775 | -3.1768762  |
| Cnnm4     | 10345482 | 6.394856 | 6.213494 | 7.454414 | 5.399358 | 5.181192 | 4.610223 | 6.687588 | 5.063591 | -1.624   | 0.023045 | 0.324435 | -3.0822781  |
| Vps41     | 10403765 | 6.779654 | 7.230655 | 6.842621 | 5.417937 | 5.155356 | 5.4125   | 6.950977 | 5.328598 | -1.62238 | 0.00607  | 0.324799 | -3.0788225  |
| Zfp558    | 10591161 | 4.697102 | 5.418913 | 4.699605 | 3.903233 | 3.126726 | 2.99685  | 4.938854 | 3.34227  | -1.59627 | 0.012639 | 0.330731 | -3.0236055  |
| Npc2      | 10401519 | 8.527747 | 8.389879 | 8.69568  | 6.931755 | 7.1017   | 6.795333 | 8.537769 | 6.942929 | -1.59484 | 0.000219 | 0.331059 | -3.0206082  |
| Nr4a2     | 10482772 | 8.89177  | 8.693312 | 8.391933 | 7.887449 | 6.996718 | 6.441231 | 8.659005 | 7.108466 | -1.55054 | 0.025354 | 0.341382 | -2.9292658  |
| Trappc6b  | 10400538 | 6.789722 | 7.412945 | 6.378741 | 5.201316 | 5.697344 | 5.031772 | 6.860469 | 5.310144 | -1.55033 | 0.01269  | 0.341433 | -2.9288319  |
| Nbeal1    | 10346695 | 5.593626 | 5.077597 | 4.912589 | 3.630979 | 3.906652 | 3.600329 | 5.194604 | 3.712653 | -1.48195 | 0.002847 | 0.358004 | -2.7932622  |
| Ttc9c     | 10465812 | 6.533618 | 7.568627 | 7.465268 | 5.86937  | 5.394108 | 5.866797 | 7.189171 | 5.710092 | -1.47908 | 0.015459 | 0.358718 | -2.7877082  |
| Zfp361    | 10401238 | 7.548295 | 7.790319 | 7.253094 | 6.523674 | 6.18713  | 5.501862 | 7.530569 | 6.070888 | -1.45968 | 0.012512 | 0.363573 | -2.7504755  |
| Dennd1b   | 10350349 | 6.171736 | 6.308435 | 6.454178 | 4.707516 | 4.459739 | 5.432108 | 6.311449 | 4.866454 | -1.44499 | 0.008838 | 0.367293 | -2.7226188  |
| Lipa      | 10467139 | 6.091858 | 5.302708 | 6.030981 | 4.664279 | 4.746397 | 4.004033 | 5.808516 | 4.47157  | -1.33695 | 0.018027 | 0.395858 | -2.52616    |
| Gbp9      | 10531980 | 5.50897  | 4.463409 | 4.711009 | 5.626974 | 3.587748 | 3.578941 | 4.894463 | 3.564554 | -1.32991 | 0.013606 | 0.397793 | -2.5138673  |
| Lrrc57    | 10486552 | 6.820895 | 7.425365 | 6.555894 | 5.721325 | 5.36784  | 5.8532   | 6.934051 | 5.647455 | -1.2866  | 0.01209  | 0.409917 | -2.4395183  |
| Usp49     | 10445702 | 5.048907 | 4.802963 | 4.781574 | 3.900145 | 3.412247 | 3.483258 | 4.877815 | 3.59855  | -1.27926 | 0.00185  | 0.412005 | -2.4271525  |
| Atf3      | 10361091 | 6.357034 | 7.176865 | 6.075612 | 5.417922 | 5.382746 | 5.182061 | 6.536504 | 5.327576 | -1.20893 | 0.023323 | 0.43259  | -2.3116572  |
| Bgn       | 10600169 | 6.486084 | 6.135998 | 5.958197 | 4.691815 | 4.801387 | 5.58183  | 6.193426 | 5.025011 | -1.16842 | 0.021801 | 0.44491  | -2.2476473  |
| Zfp259    | 10585022 | 6.668045 | 6.591244 | 7.218257 | 4.647367 | 5.828395 | 5.618467 | 6.825849 | 5.698077 | -1.12777 | 0.005619 | 0.457622 | -2.1852102  |
| Tmem65    | 10428827 | 5.224726 | 5.571834 | 4.885015 | 3.802121 | 4.497548 | 4.030269 | 5.227192 | 4.109979 | -1.11721 | 0.017239 | 0.460984 | -2.1692744  |
| Dpagt1    | 10584700 | 5.107453 | 4.436845 | 4.750303 | 3.663751 | 3.449163 | 3.88835  | 4.764867 | 3.667088 | -1.09778 | 0.009028 | 0.467235 | -2.1402496  |
| Bud31     | 10527448 | 6.051806 | 5.527946 | 5.451498 | 4.397918 | 4.566376 | 4.930498 | 5.677083 | 4.631597 | -1.04549 | 0.013076 | 0.484482 | -2.0640615  |
| Gm3771    | 10572722 | 4.909686 | 4.50835  | 4.757906 | 3.768292 | 3.624687 | 3.674077 | 4.725314 | 3.689019 | -1.0363  | 0.001133 | 0.487578 | -2.0509546  |
| Thoc5     | 10373964 | 6.839036 | 7.122177 | 6.707706 | 5.86837  | 6.001833 | 6.596614 | 6.88964  | 5.856606 | -1.03303 | 0.00235  | 0.488681 | -2.0463231  |
| Gramd1b   | 10592471 | 7.464454 | 7.642475 | 7.57601  | 6.968199 | 6.072886 | 6.552021 | 7.56098  | 6.531035 | -1.02994 | 0.017485 | 0.489729 | -2.0419456  |
| Slc35a1   | 10511975 | 6.22657  | 5.365481 | 5.862781 | 4.679428 | 4.963096 | 4.789412 | 5.818277 | 4.810645 | -1.00763 | 0.018568 | 0.497362 | -2.0106082  |
| Phyh1     | 10470959 | 4.815383 | 5.324443 | 5.180148 | 6.574805 | 5.962875 | 5.839089 | 5.106658 | 6.12559  | 1.018932 | 0.020318 | 0.206418 | 2.026418    |
| Rpl29     | 10472197 | 7.841576 | 7.880095 | 8.335871 | 9.03607  | 9.332739 | 8.791419 | 8.01918  | 9.053409 | 1.034229 | 0.009737 | 2.048019 | 2.0480186   |
| Sparc     | 10386058 | 4.981878 | 5.58544  | 4.908403 | 6.076487 | 6.107917 | 6.320586 | 5.128574 | 6.16833  | 1.039756 | 0.012504 | 2.05588  | 2.0558801   |
| Ate1      | 10568464 | 5.148541 | 4.648713 | 4.60847  | 6.120965 | 5.553047 | 5.865714 | 4.801908 | 5.846576 | 1.044668 | 0.011967 | 2.062891 | 2.062891    |
| Rpl38     | 10509560 | 8.443253 | 8.707897 | 8.975227 | 9.879999 | 9.32406  | 10.07978 | 8.708792 | 9.76128  | 1.052488 | 0.018289 | 2.074104 | 2.0741041   |
| Arhgef12  | 10582862 | 6.799099 | 6.286405 | 6.378508 | 7.243614 | 7.545316 | 7.941709 | 6.488004 | 7.576895 | 1.088891 | 0.013198 | 2.127105 | 2.1271049   |
| Hist1h2br | 10408070 | 6.982658 | 6.857615 | 6.616729 | 7.746877 | 7.912713 | 8.109242 | 6.819001 | 7.922944 | 1.103943 | 0.001816 | 2.149414 | 2.1494136   |
| Mrpl24    | 10493094 | 7.148082 | 7.384503 | 7.887601 | 8.404777 | 8.720999 | 8.665231 | 7.473396 | 8.597002 | 1.123607 | 0.009278 | 2.17891  | 2.1789105   |
| Lime1     | 10479607 | 5.827669 | 6.024718 | 5.942529 | 7.422557 | 6.718974 | 7.043816 | 5.931639 | 7.061782 | 1.130144 | 0.00588  | 2.188805 | 2.1888053   |
| Rpl21     | 10527530 | 5.245767 | 5.4556   | 4.849591 | 6.691672 | 6.197808 | 6.090529 | 5.183653 | 6.32667  | 1.143017 | 0.011205 | 2.208424 | 2.2084237   |
| Gbe1      | 10436500 | 4.677317 | 4.704112 | 5.512343 | 6.316332 | 6.083056 | 5.923521 | 4.964591 | 6.107636 | 1.143045 | 0.018279 | 2.208467 | 2.2084673   |
| Mtch2     | 10530851 | 6.140075 | 5.432257 | 6.383102 | 6.952209 | 7.124348 | 7.349649 | 5.985145 | 7.142069 | 1.156924 | 0.019744 | 2.229815 | 2.2298146   |
| Apoa1bp   | 10499309 | 6.42213  | 6.968984 | 7.152851 | 8.02883  | 7.839621 | 7.839287 | 6.847988 | 8.021679 | 1.173691 | 0.008406 | 2.25588  | 2.2558803   |
| Rnf181    | 10545394 | 7.013531 | 6.805095 | 6.449968 | 7.858126 | 7.759509 | 8.205063 | 6.756198 | 7.940899 | 1.184702 | 0.005107 | 2.273164 | 2.2731637   |
| Cdc45     | 10438378 | 5.012115 | 5.5612   | 5.171038 | 6.26854  | 6.10434  | 7.089366 | 5.248118 | 6.487416 | 1.239298 | 0.023046 | 2.360836 | 2.3608362   |
| Flot2     | 10379013 | 4.675525 | 4.072662 | 4.276976 | 5.783621 | 5.817631 | 5.359944 | 4.341721 | 5.653732 | 1.312011 | 0.004686 | 2.482874 | 2.4828738   |
| Glr3      | 10558454 | 6.750186 | 7.765369 | 7.349401 | 8.566625 | 8.328729 | 8.933121 | 7.288318 | 8.609492 | 1.321173 | 0.018291 | 2.498692 | 2.4986924   |
| Serpinp9g | 10404472 | 3.927082 | 4.70964  | 4.471062 | 5.604158 | 5.393369 | 6.157015 | 4.369261 | 5.71818  | 1.348919 | 0.014219 | 2.547212 | 2.5472119   |
| Acadm     | 10502951 | 5.691464 | 5.806684 | 5.463854 | 7.093181 | 7.393812 | 6.809677 | 5.654001 | 7.09889  | 1.444889 | 0.00182  | 2.722419 | 2.722419    |
| Hmgb2     | 10518350 | 5.574018 | 5.776207 | 6.403221 | 7.222108 | 7.719758 | 7.147754 | 5.917815 | 7.363207 | 1.445391 | 0.009305 | 2.723366 | 2.7233664   |
| Crel2     | 10426098 | 6.715661 | 5.987077 | 5.94632  | 7.716049 | 7.265607 | 8.025281 | 6.216353 | 7.668979 | 1.452627 | 0.012082 | 2.737059 | 2.737059    |
| Utp14a    | 10599498 | 3.855496 | 3.704084 | 3.962528 | 5.227831 | 5.63719  | 5.031639 | 3.840703 | 5.298887 | 1.458184 | 0.001661 | 2.747622 | 2.7476224   |
| Ndufv3    | 10443808 | 7.178546 | 6.604079 | 7.175545 | 7.904972 | 9.083359 | 8.550826 | 6.986057 | 8.513052 | 1.526996 | 0.0174   | 2.881851 | 2.8818507   |
| Slc25a5   | 10355996 | 4.522247 | 4.788194 | 5.910065 | 6.431485 | 6.813717 | 6.865182 | 5.073502 | 6.703461 | 1.629959 | 0.021797 | 3.095042 | 3.0950423   |
| Cox7c     | 10388461 | 6.917582 | 6.621416 | 6.883658 | 8.333818 | 7.854392 | 9.377561 | 6.807552 | 8.521924 | 1.714372 | 0.020249 | 3.281538 | 3.2815378   |
| Manea     | 10511881 | 5.02548  | 4.525813 | 5.758758 | 6.944834 | 6.476771 | 7.370303 | 5.10335  | 6.930636 | 1.827286 | 0.014373 | 3.548688 | 3.5486884   |
| Atp6v1b2  | 10572146 | 5.348178 | 5.52477  | 5.56434  | 6.745756 | 7.692375 | 7.212856 | 5.388332 | 7.216996 | 1.828664 | 0.003169 | 3.55208  | 3.5520797   |
| Ppt2      | 10450226 | 5.087462 | 5.055186 | 4.144185 | 7.492807 | 7.072133 | 5.960563 | 4.762278 | 6.841834 | 2.079556 | 0.019629 | 4.226772 | 4.226772    |
| Mkl2      | 10433656 | 6.382775 | 5.950235 | 6.146511 | 7.462664 | 8.193414 | 9.160294 | 6.15984  | 8.272124 | 2.112284 | 0.014101 | 4.323751 | 4.3237512   |
| Terf1     | 10344939 | 5.94157  | 4.727174 | 5.636796 | 7.670935 | 7.383434 | 8.096293 | 5.43518  | 7.716887 | 2.281708 | 0.005544 | 4.862531 | 4.8625313   |
| Mrpl50    | 10512901 | 5.070632 | 5.168646 | 4.867395 | 7.279803 | 8.609594 | 6.447193 | 5.035557 | 7.44553  | 2.409973 | 0.019274 | 5.314642 | 5.3146422   |
| Nkg7      | 10552406 | 5.295031 | 5.9008   | 5.634636 | 8.815553 | 7.323386 | 7.950948 | 5.610156 | 8.029962 | 2.419806 | 0.006585 | 5.350992 | 5.3509929   |
| Got2      | 10526838 | 6.156964 | 5.395918 | 5.377569 | 8.317904 | 9.944944 | 6.835899 | 5.643484 | 8.066249 | 2.422765 | 0.020003 | 5.361978 | 5.3619783   |
| Psmb      |          |          |          |          |          |          |          |          |          |          |          |          |             |

**Supplementary Table 3. Antibody list**

| Marker       | Cat. No.   | Clone                   | Fluor     | Vendor      |
|--------------|------------|-------------------------|-----------|-------------|
| streptavidin | 15-4317-82 |                         | PE-Cy5    | eBioscience |
| streptavidin | 47-4317-82 |                         | APC-Cy7   | eBioscience |
| streptavidin | 48-4317-82 |                         | eFluor450 | eBioscience |
| Sca-1        | 12-5981-83 | D7                      | PE        | eBioscience |
| Sca-1        | 11-5981-85 | D7                      | FITC      | eBioscience |
| c-Kit        | 47-1172-82 | ACK2                    | APC-Cy7   | eBioscience |
| c-Kit        | 17-1172-83 | ACK2                    | APC       | eBioscience |
| c-Kit        | 25-1171-81 | 2B8                     | PE-Cy7    | eBioscience |
| CD48         | 25-0481-80 | HM48-1                  | PE-Cy7    | eBioscience |
| CD150        | 115910     | TC15-12F12.2            | APC       | Biologend   |
| Annexin V    | 88-8007-74 |                         | APC       | eBioscience |
| CD45.1       | 12-0453-83 | A20                     | PE        | eBioscience |
| CD45.2       | 11-0454-85 | 104                     | FITC      | eBioscience |
| CD16/32      | 25-0161-82 | 93                      | PE-Cy7    | eBioscience |
| CD34         | 48-0341-82 | RAM34                   | eFluor450 | eBioscience |
| CD127        | 47-1271-82 | A7R34                   | APC-Cy7   | eBioscience |
| Flt3         | 15-1351-82 | A2F10                   | PE-Cy5    | eBioscience |
| Gr-1         | 13-5931-86 | RB6-8C5                 | Biotin    | eBioscience |
| Ter119       | 13-5921-85 | TER-119                 | Biotin    | eBioscience |
| B220         | 13-0452-86 | RA3-6B2                 | Biotin    | eBioscience |
| CD19         | 13-0193-85 | eBio1D3 (1D3)           | Biotin    | eBioscience |
| IgM          | 13-4341-81 |                         | Biotin    | eBioscience |
| IL-7R        | 13-1271-85 | A7R34                   | Biotin    | eBioscience |
| CD3          | 13-0033-86 | eBio500A2 (500A2)       | Biotin    | eBioscience |
| CD4          | 13-0043-85 | RM4-4                   | Biotin    | eBioscience |
| CD8          | 13-0081-82 | 53-6.7                  | Biotin    | eBioscience |
| Gr-1         | 12-5931-85 | RB6-8C5                 | PE        | eBioscience |
| MAC          | 17-0112-83 | M1/70                   | APC       | eBioscience |
| Ter119       | 17-5921-83 | TER-119                 | APC       | eBioscience |
| CD71         | 12-0711-83 | R17217 (RI7 217.1.4)    | PE        | eBioscience |
| B220         | 12-0452-85 | RA3-6B2                 | PE        | eBioscience |
| IgM          | 17-5790-82 | II/41                   | APC       | eBioscience |
| CD4          | 12-0041-85 | GK1.5                   | PE        | eBioscience |
| CD8          | 17-0081-83 | 53-6.7                  | APC       | eBioscience |
| CD41         | 25-0411-82 | eBioMWRReg30 (MWRReg30) | PE-Cy7    | eBioscience |
| F4/80        | 12-4801-82 | BM8                     | PE        | eBioscience |
| CD43         | 13-0431-82 | eBioR2/60               | Biotin    | eBioscience |
| CD25         | 12-0251-83 | PC61.5                  | PE        | eBioscience |
| CD44         | 17-0441-83 | IM7                     | APC       | eBioscience |
| BrdU         | 11-5071-42 | BU20A                   | FITC      | eBioscience |
| BrdU         | 17-5071-42 | BU20A                   | APC       | eBioscience |
| CD34         | 17-0349-42 | 4H11                    | APC       | eBioscience |

**Supplementary Table 4. Primer list**

| Primers used for mouse genotype |                                    |                                                                          |
|---------------------------------|------------------------------------|--------------------------------------------------------------------------|
| FoxM1 GT1                       | TGGCTTCCCAGCAGTACAAATC             | Detect the FoxM1 flox allele (280 bp) and FoxM1 wildtype allele (226 bp) |
| FoxM1 GT2                       | TGCTTACAAAAGACACACTTGGACG          |                                                                          |
| FoxM1 GT1                       | TGGCTTCCCAGCAGTACAAATC             | Detect deleted FoxM1 allele (400 bp)                                     |
| FoxM1 GT3                       | TCTCGCTCAATTCCAAGACCAG             |                                                                          |
| Cre1                            | CTGCATTACCGGTCGATGCAAC             |                                                                          |
| Cre2                            | GCATTGCTGTCACTTGGTCGTG             | Detect Cre allele (301bp)                                                |
| Primers used for RT-PCR (mouse) |                                    |                                                                          |
| mFoxM1-f                        | CACTTGGATTGAGGACCACTT              | Detect mouse FoxM1 mRNA levels                                           |
| mFoxM1-r                        | GTCGTTTCTGCTGTGATT                 |                                                                          |
| mNurr1-f                        | GTTTACCCTCGAAGCCGAAGAG             | Detect mouse Nurr1 mRNA levels                                           |
| mNurr1-r                        | ATAGTCAGGGTTTGCCTGGAAC             |                                                                          |
| mP21-f                          | TGACCCACAGCAGAAGAG                 | Detect mouse P21 mRNA levels                                             |
| mP21-r                          | ACCAGCCTGACAGATTTCTA               |                                                                          |
| mP27-f                          | TGGACCAAATGCCTGACTC                | Detect mouse P27 mRNA levels                                             |
| mP27-r                          | GGGAACCGTCTGAAACATTTTC             |                                                                          |
| mP57-f                          | CAGGACGAGAATCAAGAGCAG              | Detect mouse P57 mRNA levels                                             |
| mP57-r                          | CGACGCCTTGTCTCCTG                  |                                                                          |
| mP16-f                          | GGTCTTGGTCACTGTGAGGA               | Detect mouse P16 mRNA levels                                             |
| mP16-r                          | GCAGAAGAGCTGCTACGTGAA              |                                                                          |
| mCcnb1-f                        | TGTGAACCAGAGGTGGAACCTGC            | Detect mouse Ccnb1 mRNA levels                                           |
| mCcnb1-r                        | ATCGGGCTTGGAGAGGGATTATC            |                                                                          |
| mBeta-actin-f                   | TGTGATGGTGGGAATGGGTCAG             | Detect mouse Beta-actin mRNA levels                                      |
| mBeta-actin-r                   | TTTGATGTCACGCACGATTTCC             |                                                                          |
| Primers used for RT-PCR (human) |                                    |                                                                          |
| hFoxM1-1                        | TTAAGCACATTGCCAAGCCA               | Detect human FoxM1 mRNA levels                                           |
| hFoxM1-2                        | GGGGTGAATGGTCCAGAAGGA              |                                                                          |
| hNurr1-1                        | GCACAGACAGTTTAAAAGGCCG             | Detect human Nurr1 mRNA levels                                           |
| hNurr1-2                        | CTCATTTGATAGTCAGGGTTCG             |                                                                          |
| hBeta-actin-f                   | GCACAGAGCCTCGCCTT                  | Detect human Beta-actin mRNA levels                                      |
| hBeta-actin-r                   | GTTGTCGACGACGAGCG                  |                                                                          |
| Primers used for Chip assay     |                                    |                                                                          |
| Nurr1 site1-1                   | TGAGGAGAGAATTCATGTGT               | Detect FoxM1 binding site1 in Nurr1 promoter region.                     |
| Nurr1 site1-2                   | ATTCTTAGAAGGAAGGAGGT               |                                                                          |
| Nurr1 site2-1                   | GGCGTCACTGGCAGGGCGCC               | Detect FoxM1 binding site2 in Nurr1 promoter region.                     |
| Nurr1 site2-2                   | CGGCCAAGCGGTCAGCGGC                |                                                                          |
| Control-1                       | AAGAAGAGCCGTGTGCTCTCTT             | Detect a DNA fragment without FoxM1 binding site2.                       |
| Control-2                       | AACAGGACTTCTAACAGCAAGTA            |                                                                          |
| Primers used for subclone       |                                    |                                                                          |
| Nurr1 site1-f                   | TATGGTACCTGAGGAGAGAATTCATGTGT      | Subclone Nurr1 site1 into pGL3-basic vector                              |
| Nurr1 site1-r                   | TATCTCGAGATTCTTAGAAGGAAGGAGGT      |                                                                          |
| Nurr1 site2-f                   | TATGGTACCGGCGTCACTGGCAGGGCGCC      | Subclone Nurr1 site2 into pGL3-basic vector                              |
| Nurr1 site2-r                   | TATCTCGAGCGGCCAAGCGGTCAGCGGC       |                                                                          |
| Nurr1 site1                     | TATGGTACCTGAGGAGAGAATTCATGTGTACAAA | Introduce mutation in site1 of                                           |

|                       |                                                                  |                                                                                                           |
|-----------------------|------------------------------------------------------------------|-----------------------------------------------------------------------------------------------------------|
| mut1-F                | TGTGTACCACCCGCCCTTCATTTTCATTAGCCATA                              | site1-pGL3                                                                                                |
| Nurr1 site1<br>mut1-R | TATCTCGAGATTCTTAGAAGGAAGGAGGT                                    |                                                                                                           |
| Nurr1-cds-5B          | GGAAGATCTATGGATTACAAGGATGACGACGAT<br>AAGCCTTGTGTTTCAGGCGCAGTA    | Subclone Nurr1 cds into MSCV-puro<br>or MSCV-Pig vector                                                   |
| Nurr1-cds-3X          | CCGCTCGAGTTAGAAAGGTAAGGTGTCCAGGAA                                |                                                                                                           |
| Nurr1-cds-5B          | GGAAGATCTATGGATTACAAGGATGACGACGAT<br>AAGCCTTGTGTTTCAGGCGCAGTA    | Subclone Nurr1 cds into The BamHI<br>and MluI sites of pLVX-Tight-Puro<br>(pLVX-Tight-Puro-Nurr1)         |
| Nurr1-cds-3M          | CCGACGCGTTTAGAAAGGTAAGGTGTCCAGGAA                                |                                                                                                           |
| hFoxM1<br>shRNA-1-F   | CCGGGCCCAACAGGAGTCTAATCAACTCGAGTTG<br>ATTAGACTCCTGTTGGGCTTTTTG   | Human FOXM1 shRNA Oligo, oligoes<br>are annealed and ligated into<br>pLKO.1-GFP<br>(pLKO.1-GFP-shFoxM1-1) |
| hFoxM1<br>shRNA-1-R   | AATTCAAAAAGCCCAACAGGAGTCTAATCAACTC<br>GAGTTGATTAGACTCCTGTTGGGC   |                                                                                                           |
| hFoxM1<br>shRNA-2-F   | CCGGGCCAATCGTTCTCTGACAGA AACTCGAGTTCT<br>GTCAGAGAACGATTGGCTTTTTG | Human FOXM1 shRNA Oligo, oligoes<br>are annealed and ligated into<br>pLKO.1-GFP<br>(pLKO.1-GFP-shFoxM1-2) |
| hFoxM1<br>shRNA-2-R   | AATTCAAAAAGCCAATCGTTCTCTGACAGA AACTCG<br>AGTTCTGTCAGAGAACGATTGGC |                                                                                                           |
